# Supplementary material for: Foraging movements of breeding Kelp Gulls in South Africa
Source: PubMed Central journal article supplement (PMC7469291; doi:10.1186/s40462-020-00221-x), 2020-09-03

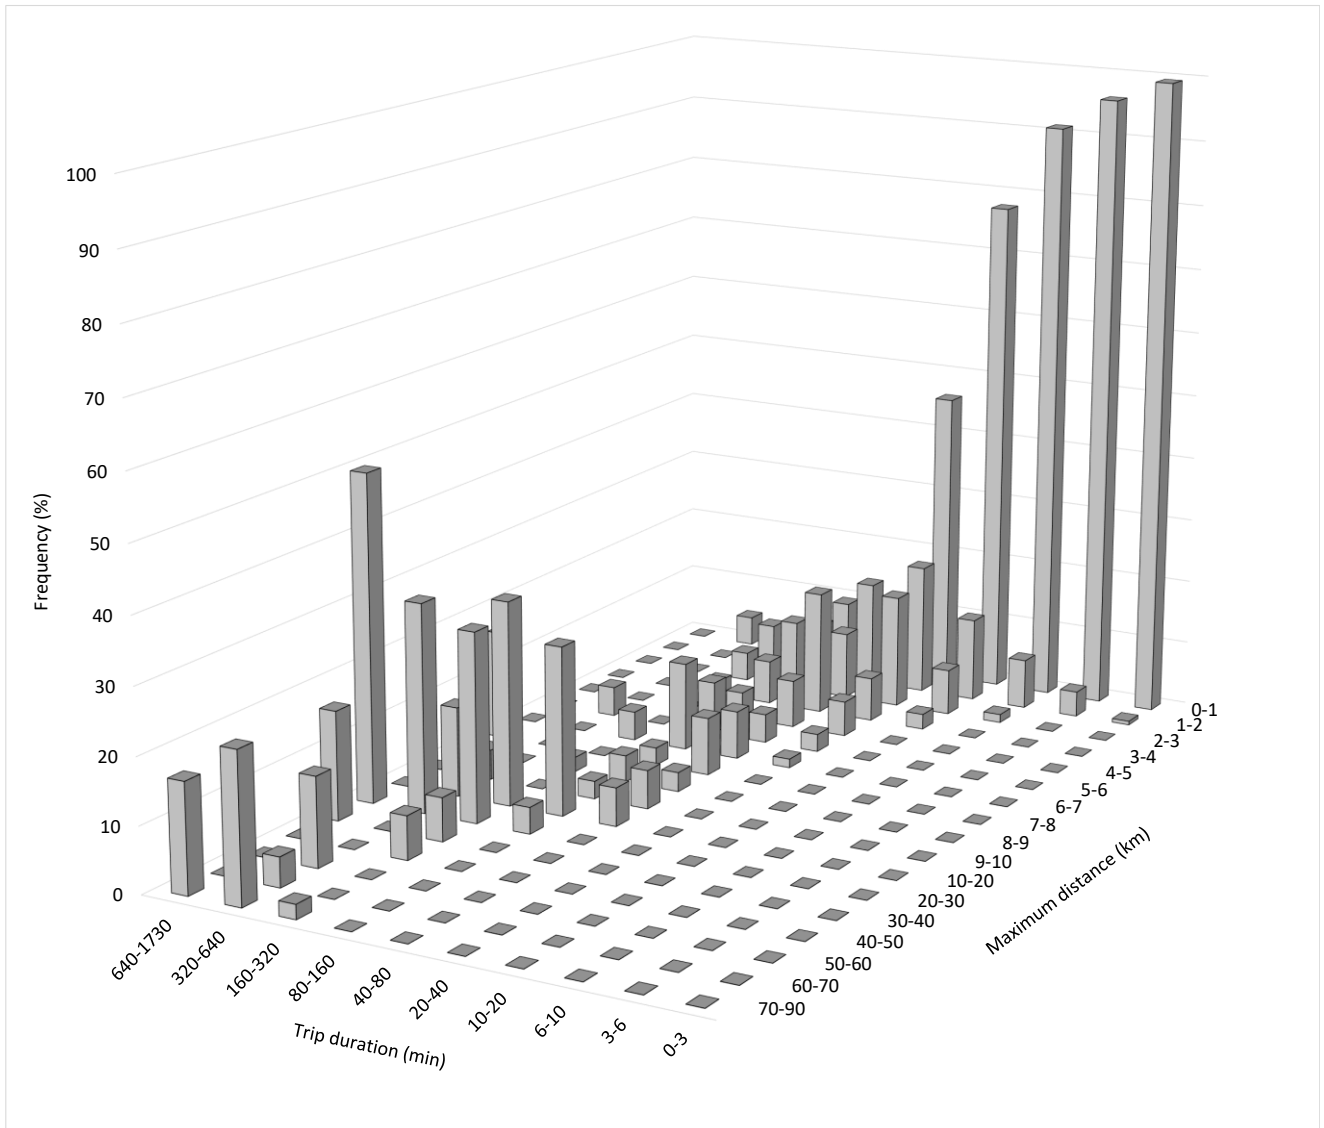

Supplement: 40462_2020_221_MOESM1_ESM.pdf [file 40462_2020_221_MOESM1_ESM.pdf]
